# Supplementary material for: Zinc Tantalum Oxynitride (ZnTaO2N) Photoanode Modified with Cobalt Phosphate Layers for the Photoelectrochemical Oxidation of Alkali Water
Source: MDPI journal article supplement (doi:10.3390/nano8010048), 2018-01-18
Supplement: s1 [file s1]

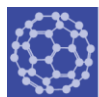

# Zinc Tantalum Oxynitride (ZnTaO<sub>2</sub>N) Photoanode Modified with Cobalt Phosphate Layers for the Photoelectrochemical Oxidation of Alkali Water

Prabhakarn Arunachalam <sup>1,\*</sup>, Maged N. Shaddad <sup>1</sup>, Mohamed A. Ghanem <sup>1</sup>, Abdullah M. Al-Mayouf <sup>1</sup> and Mark T. Weller <sup>2</sup>

<sup>1</sup> Electrochemistry Research Group, Chemistry Department, College of Science, King Saud University, Riyadh 11451, Saudi Arabia; mshaddad@ksu.edu.sa (M.N.S.); mghanem@ksu.edu.sa (M.A.G.); amayouf@ksu.edu.sa (A.M.A.-M.)

<sup>2</sup> Department of Chemistry, University of Bath, Bath BA2 7AY, UK; m.t.weller@bath.ac.uk

\* Correspondence: parunachalam@ksu.edu.sa; prabhuchemist@hotmail.com; Tel.: +00-966-114696026

Received: 18 November 2017; Accepted: 28 December 2017; Published: date

**Table S1.** Photophysical and structural properties of TaO<sub>2</sub>N based photoanodes.

| Sample               | Thickness (μm) <sup>[a]</sup> | χ   | E <sub>cb</sub> <sup>[c]</sup> | E <sub>vb</sub> <sup>[c]</sup> | Band gap E <sub>g</sub> (eV) <sup>[d]</sup> |
|----------------------|-------------------------------|-----|--------------------------------|--------------------------------|---------------------------------------------|
| TaON                 | 0.4                           | 6.3 | 0.325                          | 3.275                          | 2.95                                        |
| LaTaO <sub>2</sub> N | 0.3                           | 5.9 | 0.110                          | 2.690                          | 2.58                                        |
| ZnTaO <sub>2</sub> N | 0.4                           | 6.2 | 0.359                          | 3.100                          | 2.75                                        |

<sup>[a]</sup> Thickness of photoanodes measured by the profilometer. <sup>[b]</sup> Obtained from experimental analysis of Mott-Schotky plot. <sup>[c]</sup> Obtained by Butler and Ginley method by considering the electronegativity of the particles. <sup>[d]</sup> determined from DRS analysis using Kublenka-Munk function.

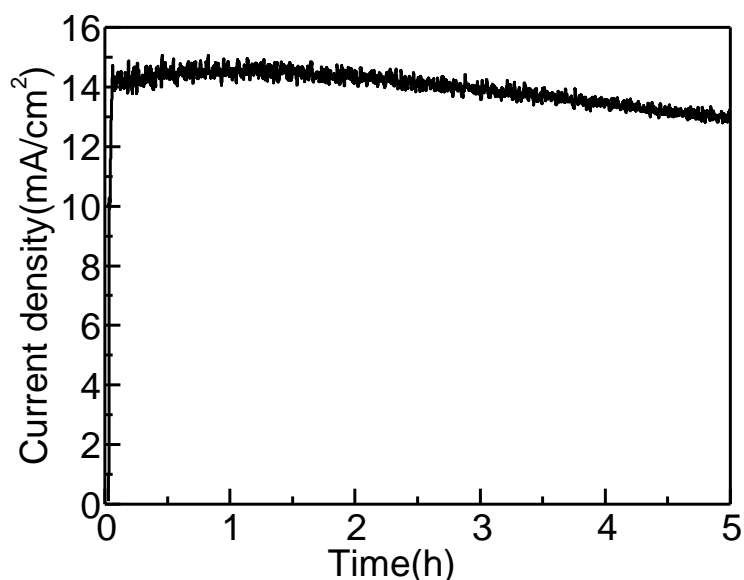

**Figure S1.** Chronoamperometric measurements in two-electrode setup in 1 M aqueous sulfate solution (pH = 13), during prolonged irradiation of visible light ( $\lambda > 420$  nm).

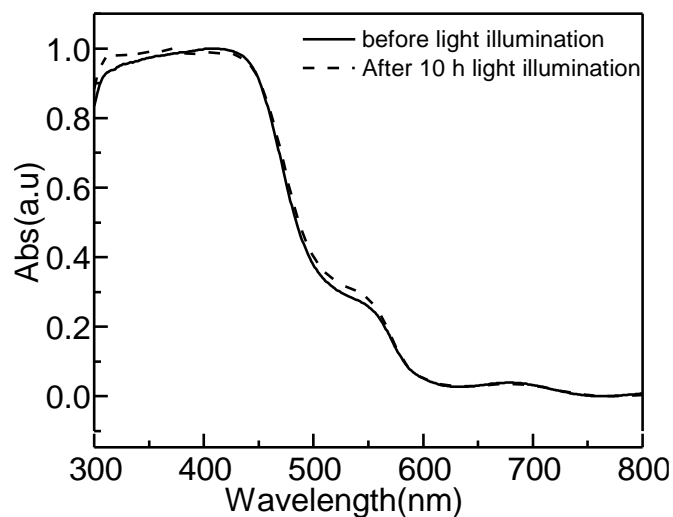

**Figure S2.** Absorption spectra of CoPi/ZnTaO<sub>2</sub>N photoanodes before and after visible-light irradiation for 10 h. No changes in the absorption spectra of the nanoparticles before and after irradiation.

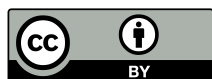

© 2017 by the authors. Submitted for possible open access publication under the terms and conditions of the Creative Commons Attribution (CC BY) license (<http://creativecommons.org/licenses/by/4.0/>).
